# Supplementary material for: An efficient method for the separation of REEs from Ba for the accurate determination of REE content in Ba-rich samples by ICP-MS
Source: Royal Society of Chemistry journal article supplement (doi:10.1039/d2ja00332e), 2022-12-23
Supplement: d2ja00332e1.pdf [file d2ja00332e1.pdf]

## Electronic Supplementary Information

### **An efficient method for separation of REEs from Ba for accurate determination of REEs contents in Ba- rich samples by ICP-MS**

Wengang Liu,<sup>a,b</sup> Yuchen An,<sup>a</sup> Qinyuan Qu,<sup>a</sup> Pengfei Li,<sup>a</sup>

Lixin Zhang,<sup>a</sup> Chaofeng Li,<sup>c</sup> Shuang Wei,<sup>b</sup> Hongying Zhou,<sup>b</sup> Jiubin Chen<sup>a\*</sup>

a. Institute of Surface-Earth System Science, School of Earth System Science, Tianjin University, Tianjin, 300072, China.

b. Tianjin Center, China Geological Survey, Tianjin, 300170, China.

c. State Key Laboratory of Lithospheric Evolution, Institute of Geology and Geophysics, Chinese Academy of Sciences, Beijing, 100029, China.

\*Corresponding author: Jiubin Chen, E-mail: [jbchen@tju.edu.cn](mailto:jbchen@tju.edu.cn)

The contents of SI:

Fig. S1. The recoveries of REEs in reference materials BCR-2 and BHVO-2.

Fig. S2. The plot of <sup>151</sup>Eu contents versus <sup>153</sup>Eu contents in four barite reference materials, and the correlation coefficient R<sup>2</sup> of 0.9998 (n=24).

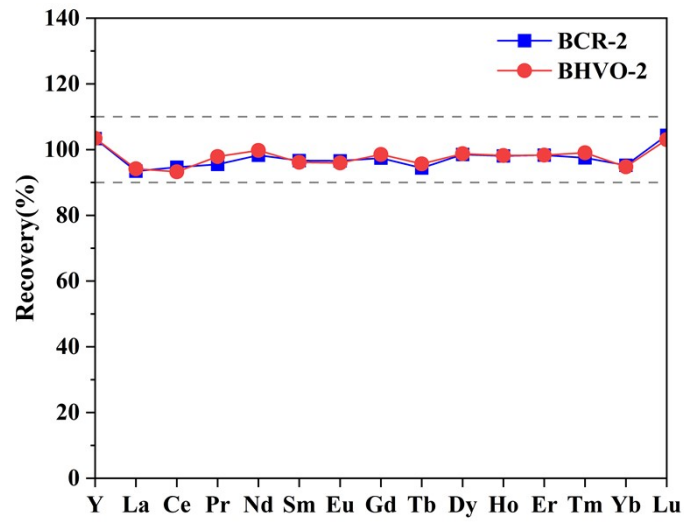

Fig. S1. The recoveries of REEs in reference materials BCR-2 and BHVO-2.

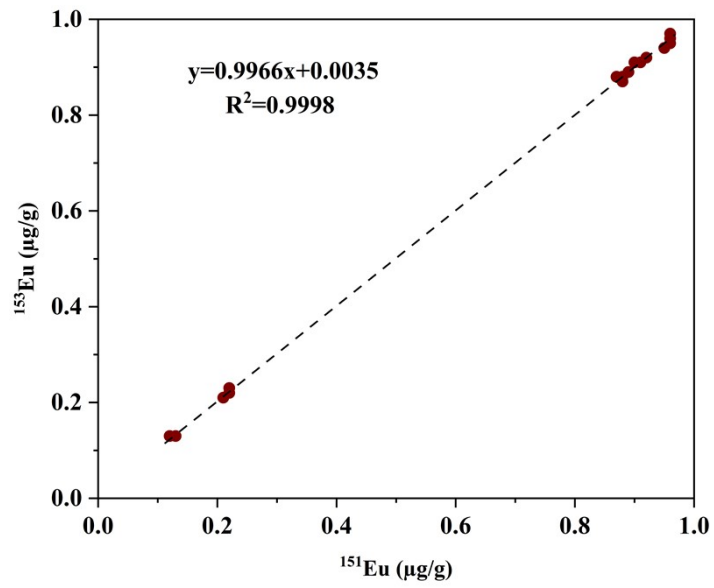

Fig. S2. The plot of <sup>151</sup>Eu contents versus <sup>153</sup>Eu contents in four barite reference materials, and the correlation coefficient  $R^2$  of 0.9998 ( $n=24$ ).
